# Supplementary material
Source: PubMed Central journal article supplement (PMC4893641)
Supplement: thnov06p1131s1.pdf [file thnov06p1131s1.pdf]

Supporting Information for Photodynamic Therapy  
Induced Enhancement of Tumor Vasculature  
Permeability Using an Upconversion Nanoconstruct  
for Improved Intratumoral Nanoparticle Delivery in  
Deep Tissues

*Weidong Gao, Zhaohui Wang, Liwei Lv, Deyan Yin, Dan Chen, Zhihao Han, Yi Ma, Min*

*Zhang, Man Yang, Yueqing Gu\**

State Key Laboratory of Natural Medicines, Department of Biomedical Engineering, School of Engineering, China Pharmaceutical University, Nanjing, 210009, P. R. China;

Corresponding author: Yueqing Gu, Ph.D. Professor of State Key Laboratory of Natural Medicines, Department of Biomedical Engineering, School of Engineering, China Pharmaceutical University, Nanjing, 210009, P. R. China; e-mail: [guyueqing@cpu.edu.cn](mailto:guyueqing@cpu.edu.cn)  
phone: 86-25-83271046 fax: 86-25-83271249

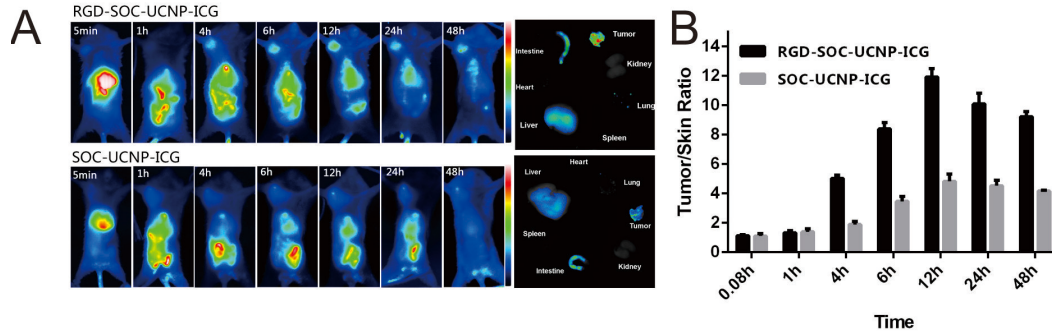

**Figure S1. Tumor targeting ability with c(RGDyK) conjugation:** (A) In vivo distribution of c(RGDyK)-SOC-UCNP-ICG and SOC-UCNP-ICG 48 hr post-injection, and ex vivo imaging with tumors as well as normal tissues;(B) Tumor:skin ratio in c(RGDyK)-SOC-UCNP-ICG and SOC-UCNP-ICG treated groups 48 hr post-injection.

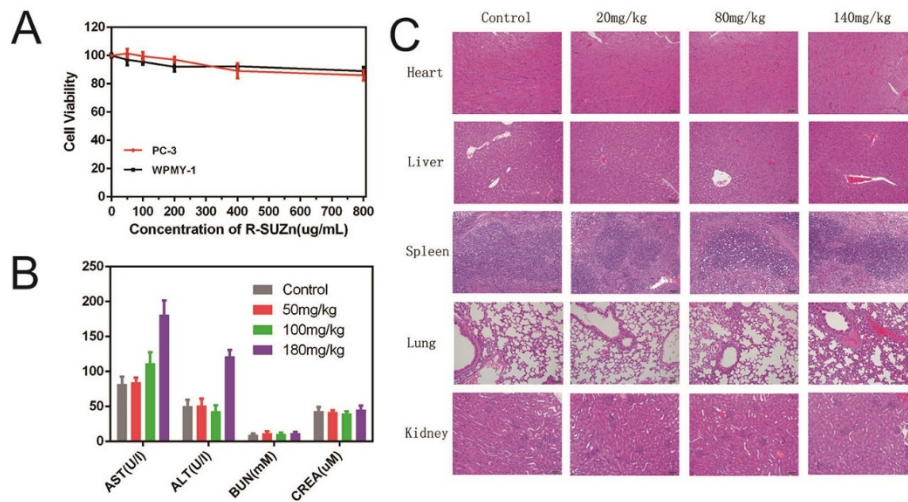

**Figure S2. R-SuZn toxicity in vitro and in vivo:** (A) Viability of PC-3 and WPMY-1 cells treated with different concentrations of R-SUZn; (B) Acute in vivo cytotoxicity of R-SuZn was indicated by changes in AST, ALT, BUN, and CREA; (C) Toxicity of R-SuZn to the major organs at different doses.

**Table S1. The median lethal dosage (LD50) of R-SuZn**

| <b>Group</b> | <b>Number of mice</b> | <b>Doses mg/kg</b> | <b>Number of dead mice</b> | <b>LD50 mg/kg</b> |
|--------------|-----------------------|--------------------|----------------------------|-------------------|
| 1            | 10                    | 0                  | 0                          |                   |
| 2            | 10                    | 20                 | 0                          |                   |
| 3            | 10                    | 50                 | 0                          |                   |
| 4            | 10                    | 80                 | 0                          | 151               |
| 5            | 10                    | 100                | 1                          |                   |
| 6            | 10                    | 140                | 3                          |                   |
| 7            | 10                    | 180                | 7                          |                   |
| 8            | 10                    | 230                | 10                         |                   |

**Table S2. Final tumor weight and tumor inhibition ratio of mice in different treatment groups.**

| <b>Group</b>                   | <b>tumor weight (g)</b> | <b>inhibition ratio (%)</b> |
|--------------------------------|-------------------------|-----------------------------|
| PBS                            | 3.49±0.42               |                             |
| R-SUZn+Doxil                   | 1.64±0.28               | 56                          |
| R-SUZn+Barrier+660 Irrad+Doxil | 1.46±0.38               | 58                          |
| R-SUZn+Barrier+980 Irrad+Doxil | 0.72±0.25               | 79                          |
| R-SUZn+660 Irrad+Doxil         | 0.68±0.36               | 80                          |
